# Supplementary material
Source: PubMed Central journal article supplement (PMC7724156)
Supplement: mmc1.pdf [file mmc1.pdf]

## Supplementary data

**Fig. 1:** 2D and 3D docking representations of ARBs and N3 inhibitor against the binding site of the COVID-19 main protease.

| No. | ARB drug    | 2D                                                                                                                                                                                                                                                                                                                                                                                                                                                                                                                                                                                                                                                                                                                                                                                                                                                                                                                                                                                                                                                                                                                                                                                                                                                                                                                                                                                                                                                                                                                                              | 3D                                                                                                     |
|-----|-------------|-------------------------------------------------------------------------------------------------------------------------------------------------------------------------------------------------------------------------------------------------------------------------------------------------------------------------------------------------------------------------------------------------------------------------------------------------------------------------------------------------------------------------------------------------------------------------------------------------------------------------------------------------------------------------------------------------------------------------------------------------------------------------------------------------------------------------------------------------------------------------------------------------------------------------------------------------------------------------------------------------------------------------------------------------------------------------------------------------------------------------------------------------------------------------------------------------------------------------------------------------------------------------------------------------------------------------------------------------------------------------------------------------------------------------------------------------------------------------------------------------------------------------------------------------|--------------------------------------------------------------------------------------------------------|
|     |             | <p> <span style="color: purple;">○</span> polar      <span style="color: green;">→</span> sidechain acceptor      <span style="border: 1px solid gray; border-radius: 50%; padding: 2px;">○</span> solvent residue      <span style="border: 1px solid gray; border-radius: 50%; padding: 2px;">○</span> arene-arene<br/> <span style="color: red;">○</span> acidic      <span style="color: green;">←</span> sidechain donor      <span style="border: 1px solid gray; border-radius: 50%; padding: 2px;">○</span> metal complex      <span style="border: 1px solid gray; border-radius: 50%; padding: 2px;">○</span> arene-H<br/> <span style="color: blue;">○</span> basic      <span style="color: blue;">→</span> backbone acceptor      <span style="border: 1px solid gray; border-radius: 50%; padding: 2px;">○</span> solvent contact      <span style="border: 1px solid gray; border-radius: 50%; padding: 2px;">○</span> arene-cation<br/> <span style="color: green;">○</span> greasy      <span style="color: blue;">←</span> backbone donor      <span style="border: 1px solid gray; border-radius: 50%; padding: 2px;">○</span> metal/ion contact<br/> <span style="border: 1px solid gray; border-radius: 50%; padding: 2px;">○</span> proximity      <span style="color: blue;">●</span> ligand exposure      <span style="border: 1px solid gray; border-radius: 50%; padding: 2px;">○</span> receptor exposure<br/> <span style="border: 1px solid gray; border-radius: 50%; padding: 2px;">○</span> contour         </p> | <p>Red dashed lines refer to hydrogen bonds, while the black ones denote hydrophobic interactions.</p> |
| 1   | Losartan    |                                                                                                                                                                                                                                                                                                                                                                                                                                                                                                                                                                                                                                                                                                                                                                                                                                                                                                                                                                                                                                                                                                                                                                                                                                                                                                                                                                                                                                                                                                                                                 |                                                                                                        |
| 2   | Candesartan |                                                                                                                                                                                                                                                                                                                                                                                                                                                                                                                                                                                                                                                                                                                                                                                                                                                                                                                                                                                                                                                                                                                                                                                                                                                                                                                                                                                                                                                                                                                                                 |                                                                                                        |
| 3   | Valsartan   |                                                                                                                                                                                                                                                                                                                                                                                                                                                                                                                                                                                                                                                                                                                                                                                                                                                                                                                                                                                                                                                                                                                                                                                                                                                                                                                                                                                                                                                                                                                                                 |                                                                                                        |

|   |             |  |  |
|---|-------------|--|--|
| 4 | Telmisartan |  |  |
| 5 | Eprosartan  |  |  |
| 6 | Irbesartan  |  |  |
| 7 | Olmesartan  |  |  |

|    |            |  |  |
|----|------------|--|--|
| 8  | Fimasartan |  |  |
| 9  | Azilsartan |  |  |
| 10 | N3         |  |  |

**Fig. 2:** A) Surface of M<sup>pro</sup> showing the positioning and fitting of tested compounds, B) surface and maps of the tested compounds compared to N3 inhibitor

| No. | ARB drug    | A                                                                                                                                                                                                                                     | B                                                                                                                                                                                                                             |
|-----|-------------|---------------------------------------------------------------------------------------------------------------------------------------------------------------------------------------------------------------------------------------|-------------------------------------------------------------------------------------------------------------------------------------------------------------------------------------------------------------------------------|
| 1   | Losartan    | 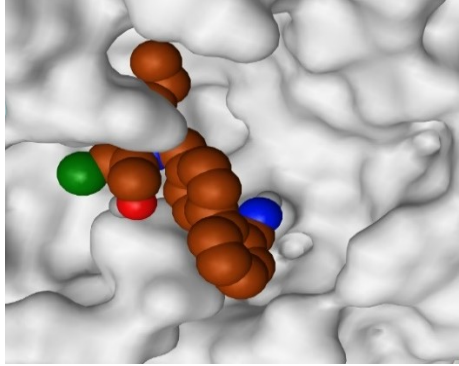 A 3D molecular model of Losartan (represented by brown, green, red, and blue spheres) docked into the grey surface of the M <sup>pro</sup> protein. |  A 3D comparison of Losartan (brown sticks) and the N3 inhibitor (blue sticks) overlaid on a red and blue electrostatic potential map.      |
| 2   | Candesartan |  A 3D molecular model of Candesartan (represented by orange, red, and blue spheres) docked into the grey surface of the M <sup>pro</sup> protein.   |  A 3D comparison of Candesartan (orange sticks) and the N3 inhibitor (blue sticks) overlaid on a red and blue electrostatic potential map. |
| 3   | Valsartan   |  A 3D molecular model of Valsartan (represented by purple, blue, and red spheres) docked into the grey surface of the M <sup>pro</sup> protein.    |  A 3D comparison of Valsartan (purple sticks) and the N3 inhibitor (blue sticks) overlaid on a red and blue electrostatic potential map.  |
| 4   | Telmisartan |  A 3D molecular model of Telmisartan (represented by red and blue spheres) docked into the grey surface of the M <sup>pro</sup> protein.           |  A 3D comparison of Telmisartan (red sticks) and the N3 inhibitor (blue sticks) overlaid on a red and blue electrostatic potential map.   |

|   |            |                                                                                     |                                                                                      |
|---|------------|-------------------------------------------------------------------------------------|--------------------------------------------------------------------------------------|
| 5 | Eprosartan | 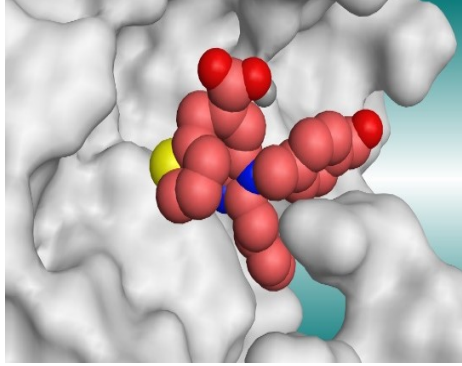   |    |
| 6 | Irbesartan |    |    |
| 7 | Olmesartan |   |   |
| 8 | Fimasartan |  |  |

|    |            |                                                                                    |                                                                                     |
|----|------------|------------------------------------------------------------------------------------|-------------------------------------------------------------------------------------|
| 9  | Azilsartan | 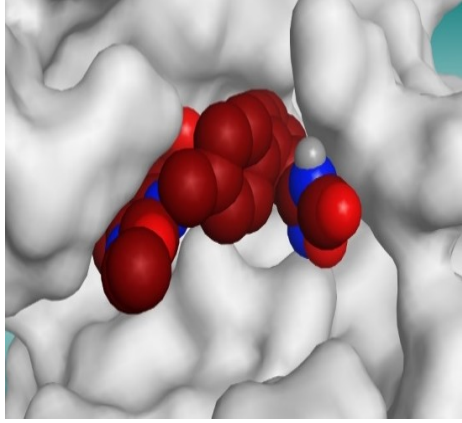  |   |
| 10 | N3         |  |  |
